# Supplementary material for: PSEN1ΔE9, APPswe, and APOE4 Confer Disparate Phenotypes in Human iPSC-Derived Microglia
Source: PubMed Central journal article supplement — Stem Cell Reports. 2019 Sep 12;13(4):669–83. doi: 10.1016/j.stemcr.2019.08.004 (PMC6829767; doi:10.1016/j.stemcr.2019.08.004), 2019-09-12
Supplement: mmc1.pdf [file mmc1.pdf]

Supplemental Information

***PSEN1*ΔE9, *APP*<sup>swe</sup>, and *APOE4* Confer Disparate Phenotypes in Human iPSC-Derived Microglia**

Henna Konttinen, Mauricio e Castro Cabral-da-Silva, Sohvi Ohtonen, Sara Wojciechowski, Anastasia Shakirzyanova, Simone Caligola, Rosalba Giugno, Yevheniia Ishchenko, Damián Hernández, Mohammad Feroze Fazaludeen, Shaila Eamen, Mireia Gómez Budia, Ilkka Fagerlund, Flavia Scoyni, Paula Korhonen, Nadine Huber, Annakaisa Haapasalo, Alex W. Hewitt, James Vickers, Grady C. Smith, Minna Oksanen, Caroline Graff, Katja M. Kanninen, Sarka Lehtonen, Nicholas Propson, Michael P. Schwartz, Alice Pébay, Jari Koistinaho, Lezanne Ooi, and Tarja Malm

Supplemental Figures

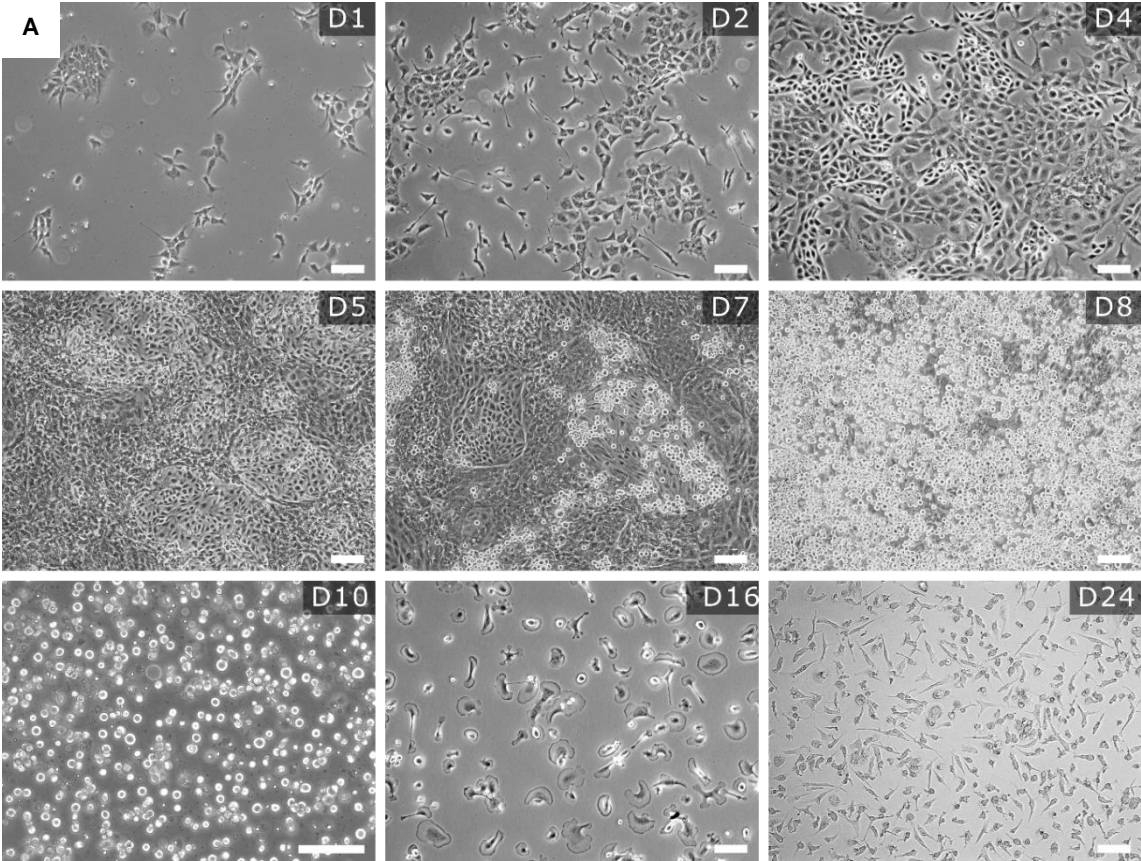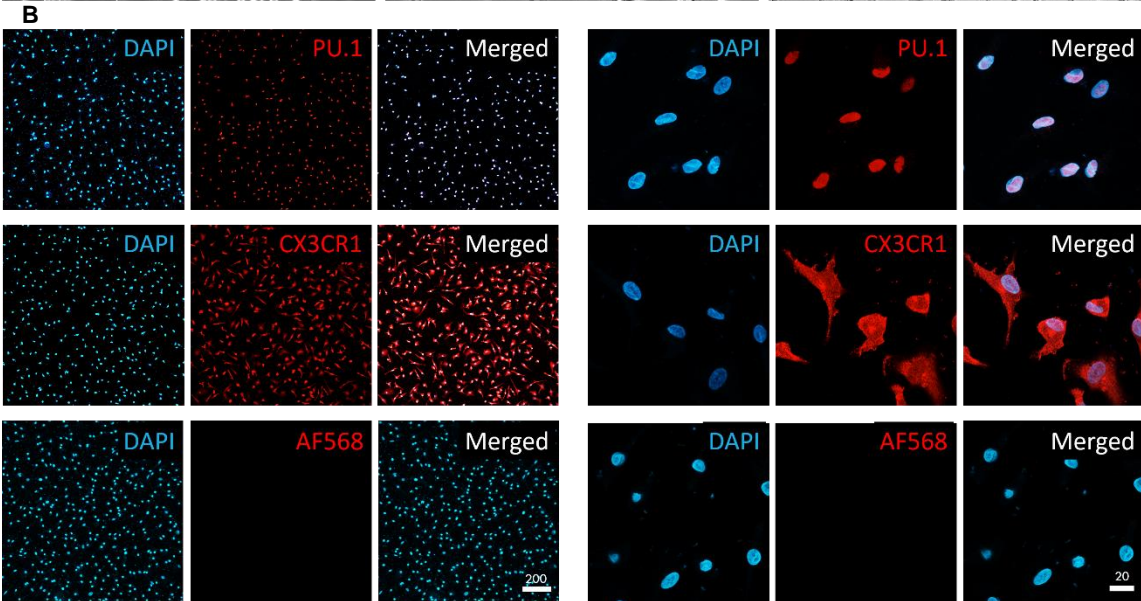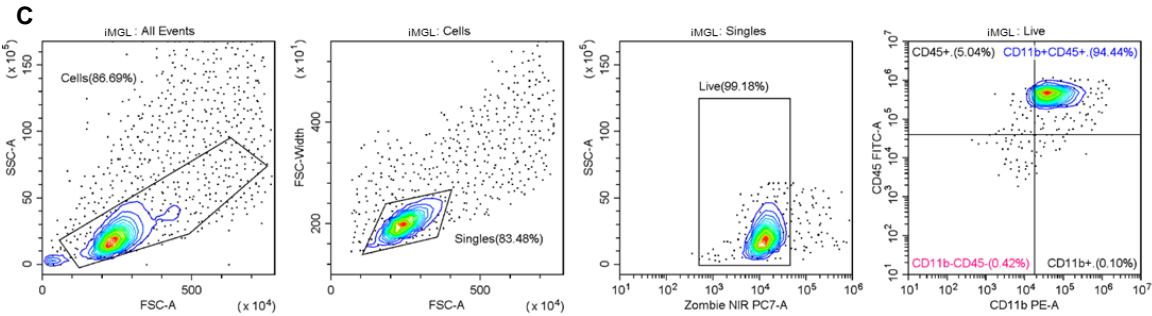

**Figure S1. Microglial identity of iMGLs. Related to Figure 1.**

(A) Morphological changes during iMGL differentiation presented as bright field images taken using ZEISS IX70 microscope with Axio Observer.Z1 (ZEISS) with 5X magnification. D1-D8 present images from Matrigel dishes, D10 and D16 on ULA-dishes and D24 shows the cells on PDL-coating. When the cells were maintained on ULA dishes after D16, they continued to have lamellipodia as presented in D16 image, whereas on PDL-coated vessels, the cells adopted more ramified and elongated morphology as presented on D24 image. Scale bar 100  $\mu\text{m}$ . (B) Representative immunocytochemistry images of D24 iMGLs labeled with DAPI (blue) and PU.1 (red), CX3CR1 (red), or only with secondary antibody AF568 as a negative control with no primary antibody. Scale bar  $\mu\text{m}$ . (C) Representative gating strategy for flow analysis for CD11b-PE and CD45-FITC double stained D24 iMGLs.

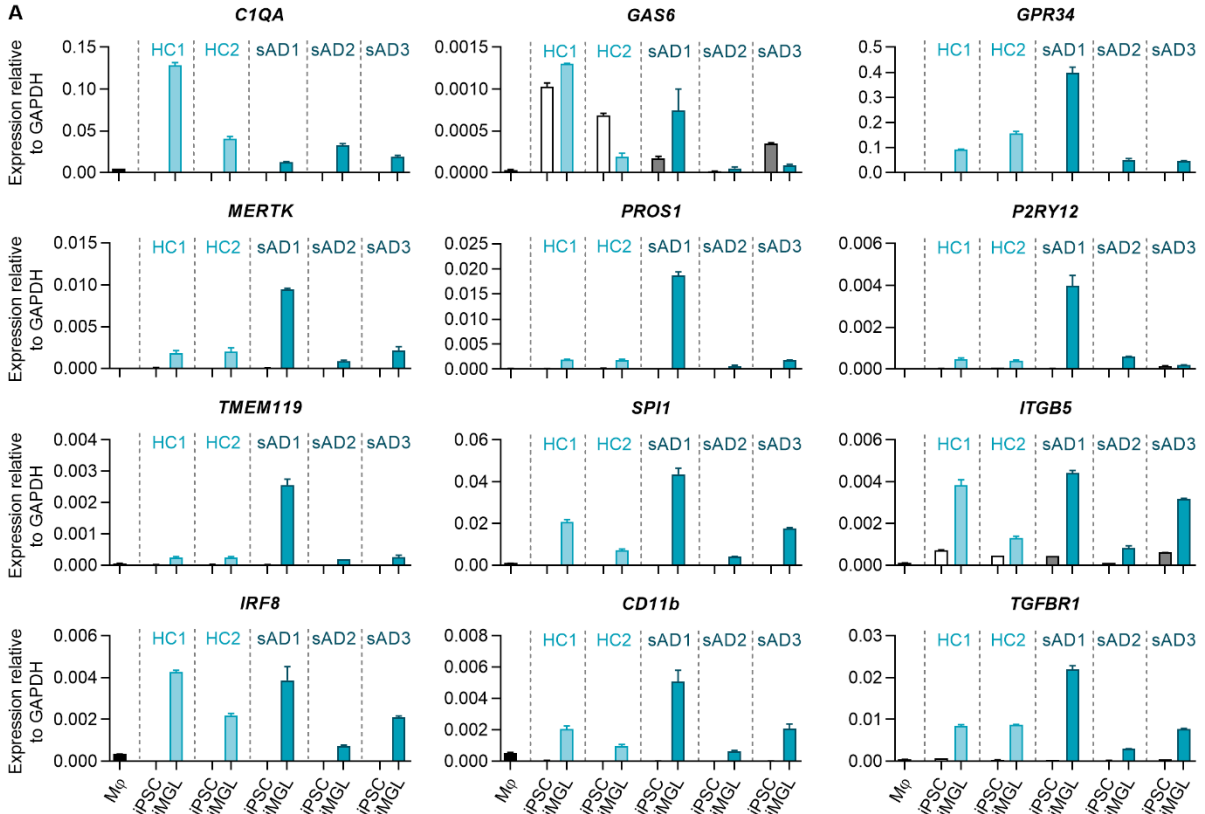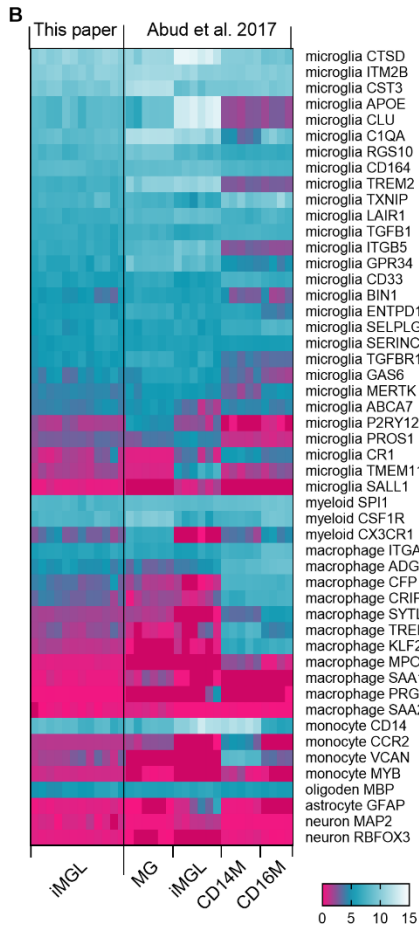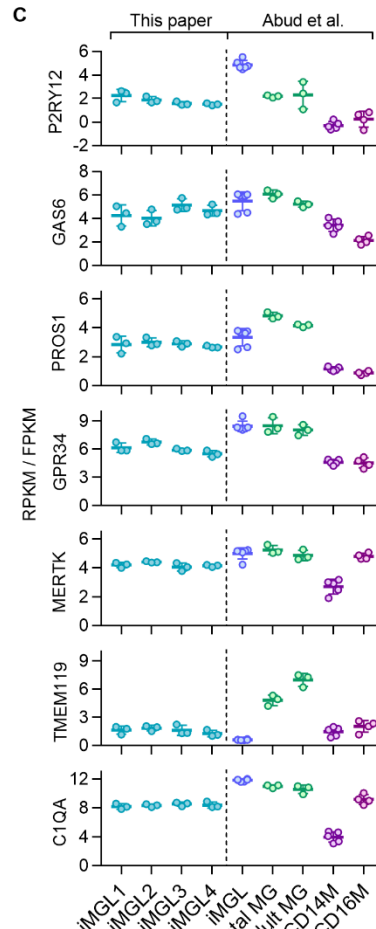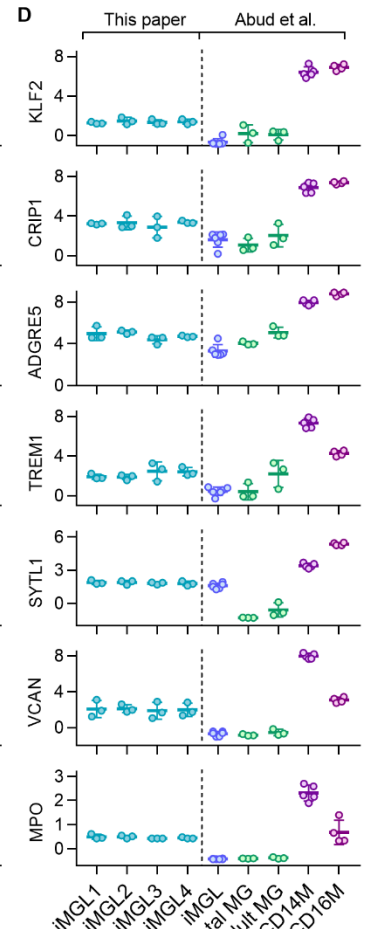

**Figure S2. Microglial gene expression. Related to Figure 1.**

qRT-PCR and RNA-seq verifies that iMGL represent microglia-like gene expression and transcriptomic profile and cluster together with human microglia. (A) The qRT-PCR of 12 microglial signature genes was analyzed relative to GAPDH from RNA harvested from iPSCs and iMGLs as well as from human PBMC-derived CD14<sup>+</sup> macrophages (M $\phi$ ). Representative data from two healthy control (HC) and three symptomatic LOAD (sAD) lines shown. n=3 technical replicates, repeated in three experiments. (B) Heat map of the RPKM/FPKM values from RNAseq data show that multiple microglial genes are highly expressed whereas macrophage genes are expressed at lower levels in iMGLs of this paper and (Abud et al., 2017) iMGLs and primary microglia (MG) compared to CD14<sup>+</sup> and CD16<sup>+</sup> monocytes/macrophages. ISO, isogenic. n=12 iMGLs including 4 cell lines from 3 batches. For further details, see Supplemental Experimental Procedures. (C) Corresponding bar figures for RPKM/FPKM values of microglial signature genes. (D) Corresponding bar figures for macrophage genes.

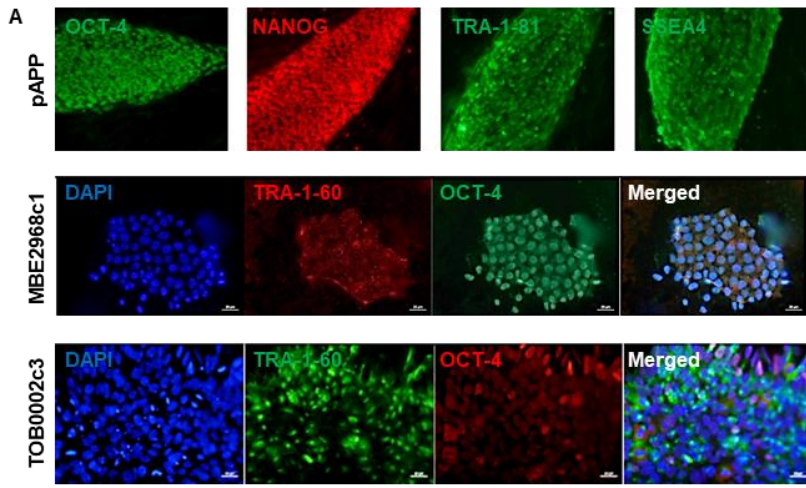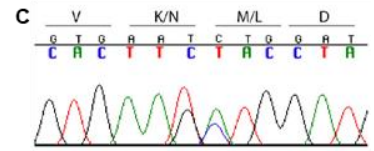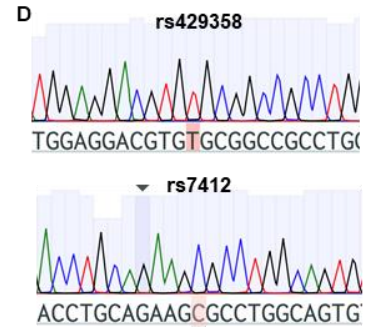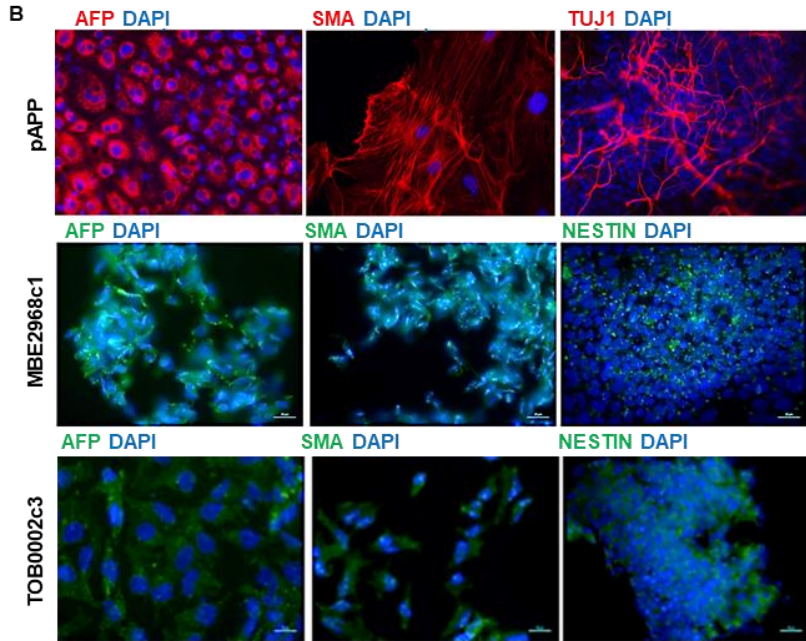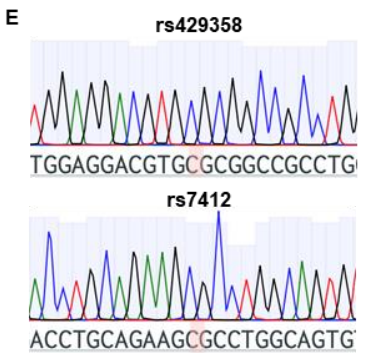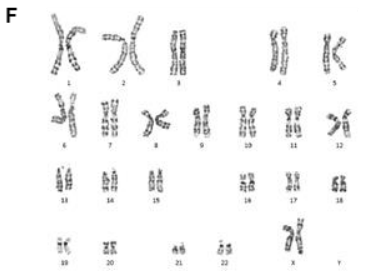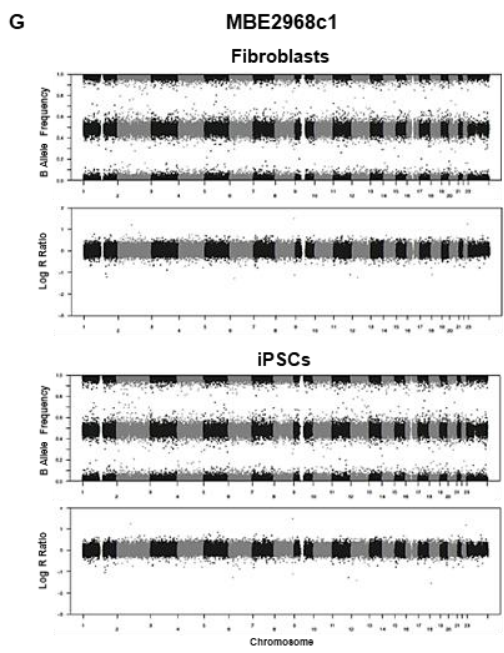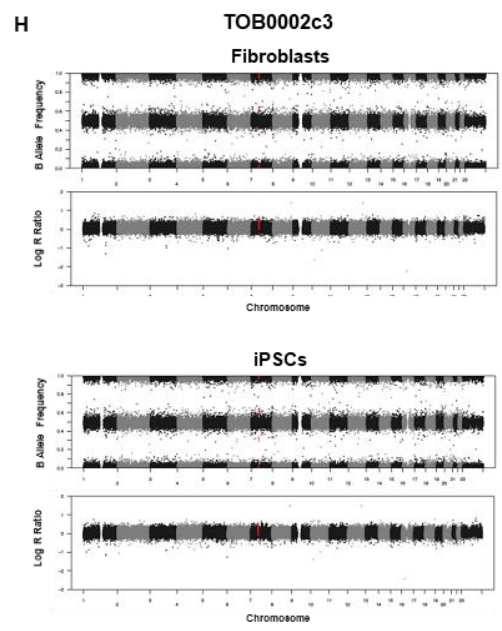

**Figure S3. Characterization of pluripotency of pAPP, MBE2968c1 and TOB0002c iPSC cell lines. Related to Figure 2.**

(A) Representative images of showing expression of the pluripotency markers TRA-1-81, NANOG, SSEA4TRA-1-60 or OCT4. (B) Representative germ layer immunostaining for clones differentiated to endoderm (AFP), mesoderm (SMA) and ectoderm (TUJ1 or NESTIN). Genomic Sanger sequencing of (C) pAPP showing a double mutation *APP KM670/671NL* (Swedish) at rs63751263 and rs63750445. Sanger sequencing for *APOE* at rs429358 and rs7412 loci confirming (D) *APOE3/3* status of MBE2968c1 and (E) *APOE4/4* status of TOB0002c3. (F) Karyotype of pAPP iPSCs. Copy Number Variation Analysis of the original fibroblasts and iPSCs (p8) for (G) MBE2968c1 and (H) TOB0002c3. Each panel shows the B allele frequency (BAF) and the log R ratio (LRR). BAF at values others than 0, 0.5 or 1 indicate an abnormal copy number. Similarly, the LRR represents a logged ratio of “observed probe intensity to expected intensity”. A deviation from zero corresponds to a change in copy number. See also Table S3.

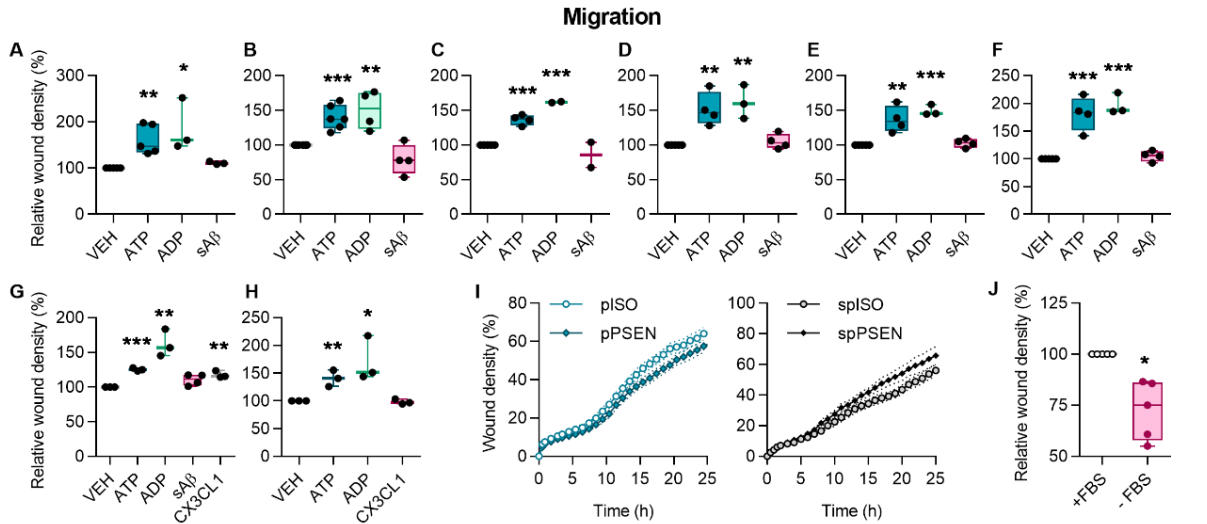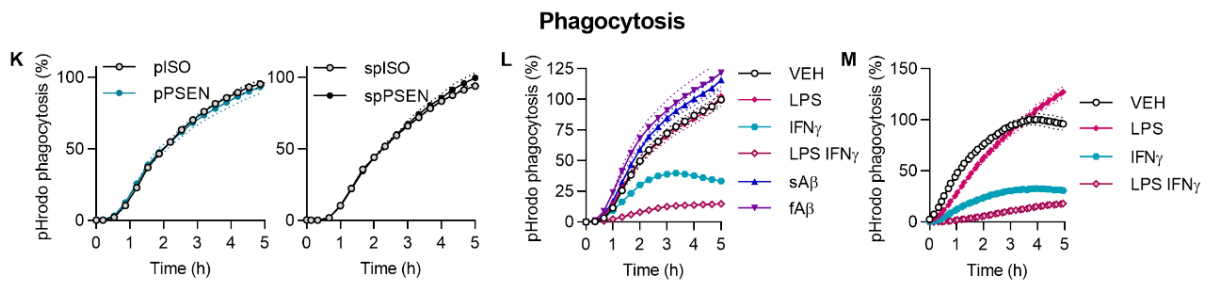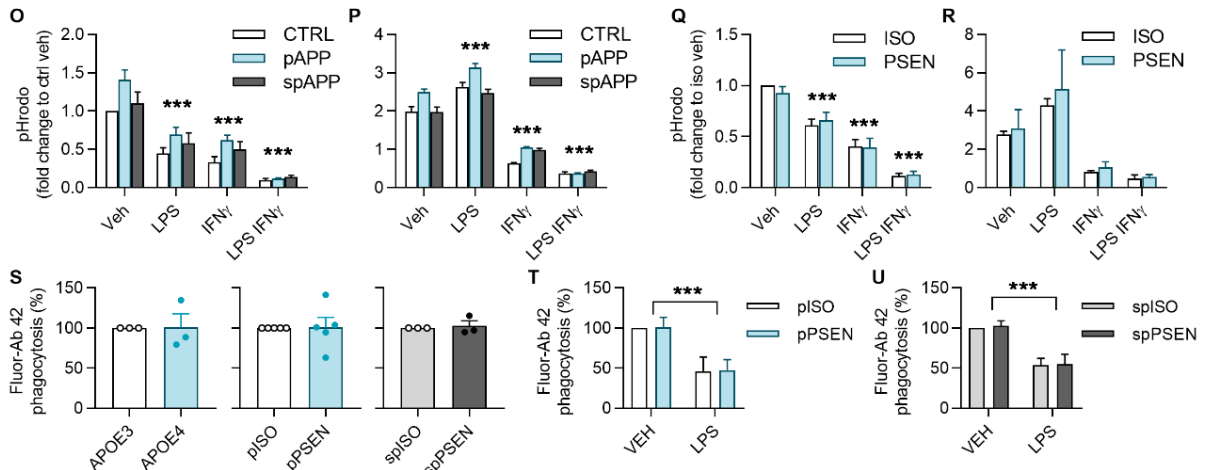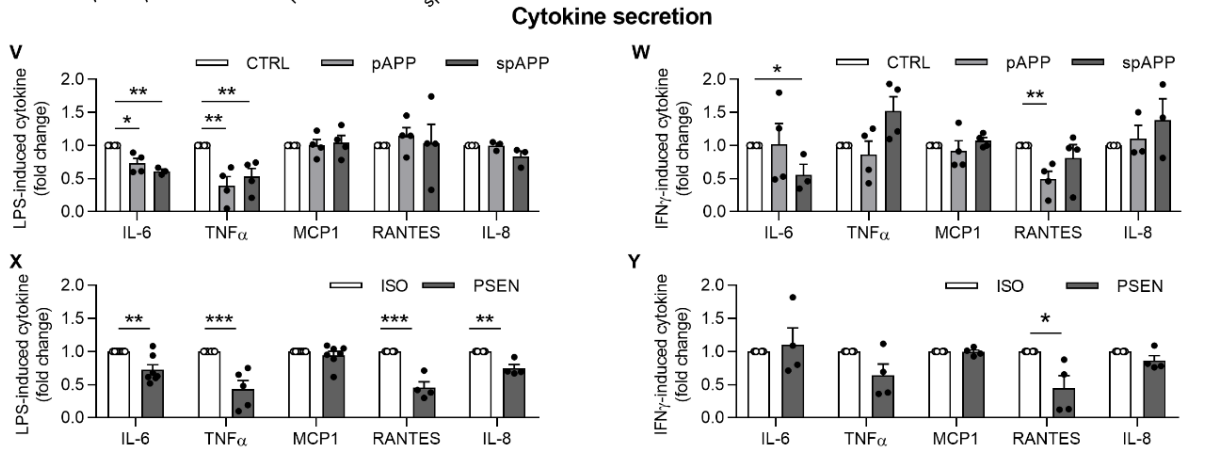



**Figure S4. Scratch wound migration, phagocytosis and cytokine secretion. Related to Figures 4-6.**

Quantification of relative wound density in response to 100  $\mu$ M ADP, ATP or fractalkine (CX3CL1) and 1  $\mu$ M sA $\beta$  treatments normalized to vehicle (VEH). (A) healthy control, (B) pre-symptomatic *APP<sup>swe</sup>* (C) symptomatic *APP<sup>swe</sup>*, (D) isogenic control of symptomatic *PSEN1 $\Delta$ E9*, (E) symptomatic *PSEN1 $\Delta$ E9*, (F) pre-symptomatic *PSEN1 $\Delta$ E9*, (G) *APOE3*, and for (H) *APOE4* iMGLs (n=2-6 batches, each with 4-5 wells). (I) Representative curves for wound density show no differences between *PSEN1 $\Delta$ E9* and isogenic control iMGLs. n=4 wells. (K) Withdrawal of FBS (-FBS) reduced migration for 27% compared to normal medium (+FBS) at 25h. n=5 batches, each with 4-5 wells. (K) Representative curves for Zymosan A pHrodo phagocytosis in pre-symptomatic and symptomatic *PSEN1 $\Delta$ E9* iMGLs and their isogenic controls. (L) Representative curves for pHrodo phagocytosis in control iMGLs with 24h pretreatment with 100 ng/ml LPS, 20 ng/ml IFN $\gamma$ , 1  $\mu$ M sA $\beta$  and 1  $\mu$ M fA $\beta$ . (M) Corresponding representative curves when stimuli is withdrawn just before the measurements. Fold change in compared to control vehicle group after (O) 2 h (n=4 batches) and (P) 6 h (n=3 batches) depicting time-dependent response in vehicle and LPS groups. Respective graphs for isogenic and *PSEN1 $\Delta$ E9* iMGLs at (Q) 2h (n=8 batches) and (R) 6h (n=2 batches). (S) Fluorescent A $\beta$  phagocytosis after 5h incubation in isogenic, *PSEN1 $\Delta$ E9*, *APOE3* and *APOE4* experiments. (T,U) LPS 100 ng/ml reduces phagocytosis of fluorescent A $\beta$  after 5h in both *PSEN1 $\Delta$ E9* iMGLs and their isogenic controls. (V) *APP<sup>swe</sup>* iMGLs secreted less IL-6 and TNF $\alpha$  compared to control iMGLs after 24 h treatment with 100 ng/ml LPS, and (W) less IL-6 and RANTES compared to control iMGLs upon 20 ng/ml IFN $\gamma$  (n=3-4 batches each with 4 wells). (X) *PSEN1 $\Delta$ E9* iMGLs secreted less IL-6, TNF $\alpha$ , RANTES, and IL-8 after LPS treatment, and (Y) less RANTES after IFN $\gamma$  treatment compared to their isogenic controls (n=4-7 batches, each with 4 wells). Data presented mean  $\pm$  SEM unpaired two-tailed t-test, one-way ANOVA or two-way ANOVA followed by Bonferroni's post hoc test, \*p<0.05, \*\*p<0.01, \*\*\*p<0.001.

## Supplemental Tables

**Table S1. RPKM/FPKM values of genes of different cell types used to obtain the heatmap. Related to Figure S3. Included as a separate excel file.**

**Table S2. Signature of microglia genes used to perform hierarchical clustering. Related to Figure 1.**

|                 |                 |                |                 |                   |                 |                 |                 |                 |
|-----------------|-----------------|----------------|-----------------|-------------------|-----------------|-----------------|-----------------|-----------------|
| <i>FUCA2</i>    | <i>SMAP2</i>    | <i>TGFB1</i>   | <i>ZBTB45</i>   | <i>GOLM1</i>      | <i>RPTOR</i>    | <i>LEMD2</i>    | <i>CXXC5</i>    | <i>TMEM63A</i>  |
| <i>SYPL1</i>    | <i>ZMPSTE24</i> | <i>TMEM147</i> | <i>IRF2BPL</i>  | <i>AKIRIN2</i>    | <i>ZNF787</i>   | <i>TAF6L</i>    | <i>PIK3CD</i>   | <i>TCF4</i>     |
| <i>IFFO1</i>    | <i>SCAMP1</i>   | <i>ERF</i>     | <i>SUPT7L</i>   | <i>LMO2</i>       | <i>RHOB</i>     | <i>STX5</i>     | <i>RGS19</i>    | <i>PEL11</i>    |
| <i>EXTL3</i>    | <i>LPCAT2</i>   | <i>HSPB1</i>   | <i>YIPF4</i>    | <i>CD63</i>       | <i>SRPRB</i>    | <i>FAM102B</i>  | <i>BSG</i>      | <i>GPAAL1</i>   |
| <i>BID</i>      | <i>EDEM2</i>    | <i>YKT6</i>    | <i>ALG5</i>     | <i>CD164</i>      | <i>OSBPL11</i>  | <i>IER5</i>     | <i>STARD5</i>   | <i>MAN1A2</i>   |
| <i>GLT8D1</i>   | <i>ERP29</i>    | <i>TGFBR1</i>  | <i>SLC35B1</i>  | <i>GNS</i>        | <i>MARCH1</i>   | <i>PPP1R21</i>  | <i>DCAKD</i>    | <i>SLC29A3</i>  |
| <i>RNASET2</i>  | <i>CDIP1</i>    | <i>ZFAND5</i>  | <i>B4GALT4</i>  | <i>EPC2</i>       | <i>GTF2H2</i>   | <i>TGFBR2</i>   | <i>MZT2A</i>    | <i>YTHDF2</i>   |
| <i>IFNTR1</i>   | <i>CMTM6</i>    | <i>TSPAN14</i> | <i>STAU1</i>    | <i>BIN1</i>       | <i>YIPF5</i>    | <i>ABHD6</i>    | <i>NRROS</i>    | <i>PNP</i>      |
| <i>ATP6V0A1</i> | <i>TMEM101</i>  | <i>SYNGR2</i>  | <i>SOX4</i>     | <i>LRRC8A</i>     | <i>SLC12A9</i>  | <i>ZNF513</i>   | <i>RHOG</i>     | <i>SFT2D1</i>   |
| <i>MFAP3</i>    | <i>AGO1</i>     | <i>TMEM104</i> | <i>TM9SF2</i>   | <i>ST6GALNAC4</i> | <i>MFHAS1</i>   | <i>DUSP7</i>    | <i>FAM210A</i>  | <i>UBE2J1</i>   |
| <i>AGA</i>      | <i>MFSD11</i>   | <i>TNFAIP1</i> | <i>MBOAT7</i>   | <i>DENND4C</i>    | <i>TACC1</i>    | <i>DAGLB</i>    | <i>CD151</i>    | <i>HACD2</i>    |
| <i>HSPA5</i>    | <i>MAST3</i>    | <i>GAB1</i>    | <i>FAM110A</i>  | <i>CNPY3</i>      | <i>MED22</i>    | <i>GALNT10</i>  | <i>MPI</i>      | <i>ZNF580</i>   |
| <i>HEXB</i>     | <i>KCNK6</i>    | <i>CD81</i>    | <i>ERGIC3</i>   | <i>FCHSD2</i>     | <i>MSRB2</i>    | <i>CAMLG</i>    | <i>CTC1</i>     | <i>SFT2D2</i>   |
| <i>HERPUD1</i>  | <i>RNF215</i>   | <i>ELK3</i>    | <i>IRF3</i>     | <i>NUMA1</i>      | <i>RGS10</i>    | <i>PEX2</i>     | <i>CALR</i>     | <i>SIPA1</i>    |
| <i>GINM1</i>    | <i>MFNG</i>     | <i>CNOT2</i>   | <i>SLC10A3</i>  | <i>RDX</i>        | <i>PAK1</i>     | <i>MID1IP1</i>  | <i>ARID3B</i>   | <i>DDAH2</i>    |
| <i>GDI2</i>     | <i>HPS4</i>     | <i>LPCAT3</i>  | <i>TMEM175</i>  | <i>ADAM10</i>     | <i>SOGA1</i>    | <i>NDST2</i>    | <i>ZBTB18</i>   | <i>IRF9</i>     |
| <i>CASP8</i>    | <i>CCDC134</i>  | <i>LDHB</i>    | <i>YWHAH</i>    | <i>ATRAID</i>     | <i>PIP4K2A</i>  | <i>TMEM135</i>  | <i>LACC1</i>    | <i>ALG3</i>     |
| <i>TMEM206</i>  | <i>SUN2</i>     | <i>PRKAB1</i>  | <i>ATF4</i>     | <i>ATAD1</i>      | <i>PDE3B</i>    | <i>TSC22D4</i>  | <i>FIZ1</i>     | <i>DDX3X</i>    |
| <i>MEF2A</i>    | <i>PACSIN2</i>  | <i>SERINC1</i> | <i>TPST2</i>    | <i>ENTPD1</i>     | <i>SCOC</i>     | <i>MARS</i>     | <i>MCFD2</i>    | <i>PPP2R2A</i>  |
| <i>ERLEC1</i>   | <i>ALKBH1</i>   | <i>SAYSD1</i>  | <i>DNAJB9</i>   | <i>ITGAV</i>      | <i>FAM49B</i>   | <i>PDIA3</i>    | <i>NRIP1</i>    | <i>TMEM185B</i> |
| <i>SEL1L</i>    | <i>ARHGAP5</i>  | <i>FBRSL1</i>  | <i>SNX6</i>     | <i>COPS4</i>      | <i>CMTM7</i>    | <i>TP53I13</i>  | <i>ATP6AP2</i>  | <i>TAPBP</i>    |
| <i>FAM3A</i>    | <i>ABHD12</i>   | <i>RNF130</i>  | <i>MAP1S</i>    | <i>RAP1GDS1</i>   | <i>SLFN13</i>   | <i>NCKAP5L</i>  | <i>TTC3</i>     | <i>RDH14</i>    |
| <i>DERL2</i>    | <i>ADNP</i>     | <i>ARSB</i>    | <i>PPT1</i>     | <i>BMP2K</i>      | <i>PLCL2</i>    | <i>NUDT16L1</i> | <i>PAQR7</i>    | <i>GNG10</i>    |
| <i>ST6GAL1</i>  | <i>CTSZ</i>     | <i>TTC1</i>    | <i>MGAT1</i>    | <i>CCNG2</i>      | <i>CNOT8</i>    | <i>TMUB2</i>    | <i>SPATA13</i>  | <i>IL10RB</i>   |
| <i>PICALM</i>   | <i>CST3</i>     | <i>TXNDC15</i> | <i>NDFIP1</i>   | <i>PAPSS1</i>     | <i>MED7</i>     | <i>MAT2A</i>    | <i>PTTG1IP</i>  | <i>TWF2</i>     |
| <i>HACD3</i>    | <i>RP2</i>      | <i>KLHL18</i>  | <i>IL13RA1</i>  | <i>DUSP6</i>      | <i>ST3GAL2</i>  | <i>INPP5D</i>   | <i>TM2D3</i>    | <i>GATC</i>     |
| <i>SLC46A1</i>  | <i>CLN5</i>     | <i>RTN4</i>    | <i>STARD3</i>   | <i>GIT2</i>       | <i>SLC35B2</i>  | <i>COMMD8</i>   | <i>SNN</i>      | <i>SRGAP2</i>   |
| <i>IL4R</i>     | <i>MGRN1</i>    | <i>GGCX</i>    | <i>CHSY1</i>    | <i>CSAD</i>       | <i>SPPL3</i>    | <i>MAP2K1</i>   | <i>BTBD6</i>    | <i>STRADA</i>   |
| <i>ACER3</i>    | <i>N4BP1</i>    | <i>GORASP2</i> | <i>SERPINF1</i> | <i>LPAR6</i>      | <i>SKI</i>      | <i>INO80E</i>   | <i>ATP6V0A2</i> | <i>CYFIP1</i>   |
| <i>MKNK1</i>    | <i>SLC38A7</i>  | <i>NFE2L2</i>  | <i>PTPRA</i>    | <i>RBM26</i>      | <i>WASF2</i>    | <i>PWWP2A</i>   | <i>SP1</i>      | <i>ORAI1</i>    |
| <i>REXO1</i>    | <i>USP10</i>    | <i>TMEM59</i>  | <i>SERINC3</i>  | <i>TSPAN3</i>     | <i>F11R</i>     | <i>ZNF282</i>   | <i>ZFP36L1</i>  |                 |
| <i>EPB41L2</i>  | <i>LMF1</i>     | <i>SCAMP3</i>  | <i>SARAF</i>    | <i>SCAMP2</i>     | <i>B4GALT3</i>  | <i>ELP5</i>     | <i>BICD2</i>    |                 |
| <i>STX7</i>     | <i>RAB11A</i>   | <i>RGS2</i>    | <i>CTIF</i>     | <i>UNC45A</i>     | <i>IFNTR2</i>   | <i>PFKFB3</i>   | <i>TPCN1</i>    |                 |
| <i>SLC35C2</i>  | <i>BMF</i>      | <i>ABCD3</i>   | <i>VHL</i>      | <i>ARMC5</i>      | <i>ARHGAP27</i> | <i>KBTBD2</i>   | <i>SEMA4D</i>   |                 |
| <i>SESN1</i>    | <i>LEPROTL1</i> | <i>RPS6KA1</i> | <i>ARL8B</i>    | <i>PRPSAP2</i>    | <i>BTG2</i>     | <i>RNF139</i>   | <i>PLSCR3</i>   |                 |
| <i>CLDND1</i>   | <i>ASAHI</i>    | <i>CCNI</i>    | <i>IL6ST</i>    | <i>G6PC3</i>      | <i>HK2</i>      | <i>JAGN1</i>    | <i>TSPYL1</i>   |                 |
| <i>RNF13</i>    | <i>CLPTM1</i>   | <i>HS1BP3</i>  | <i>TMED7</i>    | <i>GALNT1</i>     | <i>CCDC107</i>  | <i>BCL2L1</i>   | <i>PNRC2</i>    |                 |
| <i>OXCT1</i>    | <i>SNAPC2</i>   | <i>NEK6</i>    | <i>NAA35</i>    | <i>SLC16A3</i>    | <i>FMNL3</i>    | <i>CLSTN1</i>   | <i>SLC35E2B</i> |                 |

**Table S3. Demographic information of each iPSC-line. Related to Figure 2. See also Figure S3.**

| Alias           | Cell line        | Sex | Health status       | Age at biopsy | Mutation genotype              | Sample origin | Reprogramming method                    | Karyotype      | Reference                       |
|-----------------|------------------|-----|---------------------|---------------|--------------------------------|---------------|-----------------------------------------|----------------|---------------------------------|
| <b>CTRL</b>     | Ctrl1            | F   | Healthy             | Adult         | -                              | Skin biopsy   | SeV 1.0                                 | 46XX<br>Normal | Holmqvist et al. 2016           |
| <b>CTRL</b>     | Ctrl3            | F   | Healthy             | 44 y          | -                              | Skin biopsy   | SeV 1.0                                 | 46XX<br>Normal | Oksanen et al. 2017             |
| <b>spPSEN</b>   | AD2              | M   | FAD                 | 48 y          | <i>PSEN1ΔE9</i> deletion       | Skin biopsy   | SeV 2.0                                 | 46XY<br>Normal | Oksanen et al. 2017             |
| <b>pPSEN</b>    | AD3              | F   | FAD pre-symptomatic | 47 y          | <i>PSEN1ΔE9</i> deletion       | Skin biopsy   | SeV 2.0                                 | 46XX<br>Normal | Oksanen et al. 2017             |
| <b>spISO</b>    | AD2 iso          | M   | FAD corrected       | 48 y          | <i>PSEN1ΔE9</i> corrected      | Skin biopsy   | SeV 2.0<br>CRISPR/Cas9                  | 46XY<br>Normal | Oksanen et al. 2017             |
| <b>pISO</b>     | AD3 iso          | F   | FAD corrected       | 47 y          | <i>PSEN1ΔE9</i> corrected      | Skin biopsy   | SeV 2.0<br>CRISPR/Cas9                  | 46XX<br>Normal | Oksanen et al. 2017             |
| <b>spAPP</b>    | LL008            | F   | FAD                 | 48 y          | <i>KM670/671NL</i> APP Swedish | Skin biopsy   | SeV 1.0                                 | 46XX<br>Normal | Oksanen et al. 2018             |
| <b>pAPP</b>     | LL116            | F   | FAD pre-symptomatic | 30 y          | <i>KM670/671NL</i> APP Swedish | Skin biopsy   | SeV 2.0                                 | 46XX<br>Normal | Figure S3.                      |
| <b>APOE3</b>    | MBE 2968 clone 1 | F   | Healthy             | 65 y          | <i>APOEε3/3</i>                | Skin biopsy   | Episomal reprogramming by nucleofection | 46XX<br>Normal | Figure S3.                      |
| <b>APOE4</b>    | TOB 0002 clone 3 | F   | Non-symptomatic     | 52 y          | <i>APOEε4/4</i>                | Skin biopsy   | Episomal reprogramming by nucleofection | 46XX<br>Normal | Figure S3.                      |
| <b>APOE3</b>    | HC1              | M   | Healthy             | 57 y          | <i>APOEε3/3</i>                | Skin biopsy   | mRNA                                    | 46XY<br>Normal | Balez et al., 2016              |
| <b>APOE3</b>    | HC2              | F   | Healthy             | 75 y          | <i>APOEε3/3</i>                | Skin biopsy   | mRNA                                    | 46XX<br>Normal | Muñoz et al., 2018              |
| <b>APOE 3/4</b> | HC3              | F   | Healthy             | 59 y          | <i>APOEε3/4</i>                | Skin biopsy   | mRNA                                    | 46XX<br>Normal | UOW - manuscript in preparation |
| <b>APOE 3/4</b> | LOAD1            | M   | LOAD                | 65 y          | <i>APOEε3/4</i>                | Skin biopsy   | mRNA                                    | 46XY<br>Normal | Balez et al., 2016              |
| <b>APOE4</b>    | LOAD2            | F   | LOAD                | 83 y          | <i>APOEε4/4</i>                | Skin biopsy   | mRNA                                    | 46XX<br>Normal | UOW - manuscript in preparation |
| <b>APOE4</b>    | LOAD3            | M   | LOAD                | 77 y          | <i>APOEε4/4</i>                | Skin biopsy   | mRNA                                    | 46XY<br>Normal | Ooi et al., 2013                |

FAD, famimial Alzheimer's disease; LOAD, late-onset Alzheimer's disease; F, female; M, male; y, years.

## Supplemental Experimental Procedures

### Karyotyping

iPSCs were confirmed to have normal euploid karyotypes via Giemsa (G-banding) staining (pAPP) or by virtual karyotyping (TOB0002c3, MBE2968c1)(Figure S3). For Giemsa staining iPSCs were arrested with 200 ng/ml KaryoMAX® Colcemid™ (Invitrogen), harvested and 20 metaphase cells were analyzed at the Eastern Finland Laboratory Centre Joint Authority Enterprise (ISLAB, Kuopio, Finland). In virtual karyotyping the copy number variation (CNV) analysis of original fibroblasts and iPSCs was performed using HumanCore Beadchip arrays (Illumina). CNV analyses were performed using PennCNV and QuantiSNP (Wang et al., 2007, Colella et al., 2007) with default parameter settings. Chromosomal aberrations were deemed to involve at least 10 contiguous single nucleotide polymorphisms (SNPs) or a genomic region spanning at least 1MB. The B allele frequency (BAF) and the log R ratio (LRR) were extracted from GenomeStudio (Illumina) for representation. All three lines were confirmed to express high levels of pluripotent markers and to have the ability to form all three germ layers by immunocytochemistry. Embryoid bodies were obtained as described (Lim et al., 2013) and using tri-lineage differentiation kit (Stem Cell Technologies).

### Flow Cytometer Analysis

The flow cytometer analysis was performed every second day throughout the 24-day differentiation process. Cells were detached with Accutase, centrifuged 300 x g, 5 min and filtered through a 70 µm mesh (Corning). Approximately 200 000 cells were used for each sample and staining controls, including unstained, single color, and secondary-only. Fluorescence minus one (FMO) controls were also prepared for gating purposes. Cells were stained with Zombie NIR fixable viability dye (1:1000, Biolegend), blocked with human FcR blocking reagent (Miltenyi Biotec), and then incubated with conjugated antibodies for 30 min at 4°C. The following antibodies were used: CD11b-APC-eFluor780 (M1/70), CD34-APC (4H11), CD41a-BB515 (HIP8), CD45-PerCP/Cy5.5 (2D1), CD117 (cKit)-BB515 (104D2), CD144 (VE-cadherin)-PE (55-7H1), CD235a (HIR2)-BB515 (GA-R2), and CD309 (KDR)-PE (89106). For intracellular staining, cells were fixed in Fix/Perm buffer for 25 min (Foxp3 Buffer Set, eBioscience), incubated with primary antibody IBA1 (1:50, Wako) for 40 min at 4°C, followed by labeling with secondary antibody goat anti-rabbit Alexa Fluor 488 (1:1000, Invitrogen) for 30 min at RT. Samples were washed between each step and resuspended in flow buffer containing 1% FBS in PBS. Samples were run on a FACSAriaIII (BD Biosciences), equipped with 488 and 633nm lasers with standard configuration or on CytoFlex S (Beckman Coulter) equipped with 405, 488, 561, and 638nm lasers. At least 50 000 single events were collected. Data was analyzed with FCSEXPRESS v6 (De Novo) or CytExpert v2.3 (Beckman Coulter). The flow cytometry analysis was repeated with 4 cell lines including both AD and isogenic genotypes from 2-3 batches.

### RNA-Seq and analysis

iMGLs were cultured at density of 2 mln cells per PDL-coated 6 cm dish and total RNA was extracted using mirVana™ miRNA Isolation Kit (Invitrogen) following manufacturer's guidelines. RNA integrity (RIN) was measured for all samples using the Bioanalyzer Agilent 2100 series. The quality was confirmed with Advanced Analytical Fragment Analyzer at Finnish Functional Genomics Centre (FFGC, Turku, Finland) and further library construction and sequencing was performed at FFGC. Total of 300 ng of high integrity RNA with RIN > 9.1 was used to generate sequencing libraries with Illumina TruSeq® Stranded mRNA to obtain poly-A mRNA. The high quality of the libraries was confirmed with Advanced Analytical Fragment Analyzer and the concentrations of the libraries were quantified with Qubit® Fluorometric Quantitation (Life Technologies). The samples were sequenced as single-end 50 bp reads on the Illumina HiSeq 3000 instrument.

Raw FASTQ files were analyzed for quality assessment using FastQC software. Read alignment and transcript quantification were performed using RSEM 1.3.1(Li, Dewey, 2011) with "--strandness reverse" and "--estimate-rspd" parameters. Hg38 was used as reference genome. All subsequent analyses were conducted with the R/Bioconductor platform. RSEM estimated counts were imported using the package Tximport (Soneson, Love & Robinson, 2015). This package allows to incorporate the average transcript length per gene as a normalization factor that can be used with statistical tools such as limma (Ritchie et al., 2015) and DESeq2 (Love, Huber & Anders, 2014). Hierarchical clustering was performed together with published data (Abud et al., 2017) using the function "hclust" with Euclidean distance on FPKM expression data. The analysis was performed using microglia signature genes (Table S2) adapted from already published data (Lavin et al., 2014) provided by the Bioconductor AUCell package (Aibar et al., 2017). Mouse identifiers have been mapped into HGNC symbols through the NCBI HomoloGene database (Wheeler et al., 2007). Genes with expression (< 1 FPKM) across all samples were discarded. Before clustering and other comparisons with data in Abud et al., the following preprocessing steps have been performed. The two studies have been separately log2-transformed (adding a pseudo-count of 1) and normalized for row using the function "normalize.quantiles" of the package preprocessCore that performs a normalization based on upon the concept of a quantile-quantile plot (Bolstad et al., 2003). Subsequently, data

have been batch corrected to remove the bias due to the technical variability of the two studies. Batch correction was performed using the function “removeBatchEffect” of the limma package.

### qRT-PCR

The RNA was extracted from  $10^6$  *APOE* iMGLs, iPSCs and blood-derived macrophages using TRIreagent (Bioline) and genomic DNA was removed with TURBO DNA-free (Thermo Fisher Scientific) following the manufacturer’s instructions. RNA concentration was analyzed using a Nanodrop 2000C spectrophotometer (Thermo Fisher Scientific). RNA was reverse transcribed to cDNA using the Tetro cDNA synthesis kit (Bioline) and Oligo dT18 primers incubated at 45 °C for 30 min followed by a 5 min incubation at 85 °C to terminate the reaction. Gene expression was measured by qRT-PCR using SENSifast SYBR No-ROX PCR mix (Bioline) and a Rotor Gene 3000 Real-time PCR machine (Corbett Research) with 40 cycle amplification. Melt-curve analysis and gel electrophoresis were utilised to check amplicon size. Reactions were conducted in duplicate whilst non-template controls (substituting cDNA for water) and RNA controls were implemented to confirm that contamination, primer dimers and genomic DNA were not contributing to the signal. Data was normalised to GAPDH expression, sample efficiency/cycle threshold values were determined using LinRegPCR (Ruijter et al., 2009) and relative gene expression was determined by using the comparative threshold cycle method (Schmittgen, Livak, 2008). RNA was also extracted from *APP<sup>swe</sup>* and *PSEN1 $\Delta$ E9* iMGLs and iPSCs by mirVana™ miRNA Isolation Kit (Invitrogen). Subsequent cDNA synthesis was performed with Maxima reverse transcriptase (Thermo Scientific) and the mRNA expression levels were determined by qRT-PCR (StepOne Plus Real-Time PCR system; Life Technologies) using TaqMan assay mixes (Thermo Scientific). Expression levels were normalized to *ACTB* and *GAPDG* expression.

**Table of primers assay mixes used for mRNA expression studies.**

| Gene          | Identifier    | Source |
|---------------|---------------|--------|
| <i>ACTB</i>   | Hs99999903_m1 | TaqMan |
| <i>GAPDH</i>  | Hs02758991_g1 | TaqMan |
| <i>CIQA</i>   | Hs00706358_s1 | TaqMan |
| <i>CIqR</i>   | Hs00362607_m1 | TaqMan |
| <i>CD11b</i>  | Hs00355885_m1 | TaqMan |
| <i>P2RY12</i> | Hs00224470_m1 | TaqMan |
| <i>CR1</i>    | Hs00559348_m1 | TaqMan |
| <i>CSF1R</i>  | Hs00911250_m1 | TaqMan |
| <i>PROS</i>   | Hs00165590_m1 | TaqMan |
| <i>GAS6</i>   | Hs01090305_m1 | TaqMan |
| <i>GPR34</i>  | Hs00271105_s1 | TaqMan |
| <i>MERTK</i>  | Hs01031979_m1 | TaqMan |
| <i>IRF8</i>   | Hs00175238_m1 | TaqMan |
| <i>PU.1</i>   | Hs02786711_m1 | TaqMan |
| <i>TREM2</i>  | Hs00219132_m1 | TaqMan |
| <i>TYROBP</i> | Hs00182426_m1 | TaqMan |

**Table of primers used for mRNA expression studies.**

| Target                | Sequence                          | Species |
|-----------------------|-----------------------------------|---------|
| <i>hF_ITGAM-CD11B</i> | GAAAGGCAAGGAAGCCGGAG              | human   |
| <i>hR_ITGAM-CD11B</i> | TGGATCTGTCCTTCTCTTAGCCG           | human   |
| <i>hF_CX3CR1</i>      | TGGGGCCTTCACCATGGAT               | human   |
| <i>hR_CX3CR1</i>      | GCCAATGGCAAAGATGACGGAG            | human   |
| <i>hF_P2ry12</i>      | TTTGTGTGTCAAGTTACCTCCG            | human   |
| <i>hR_P2ry12</i>      | CTGGTGGTCTTCTGGTAGCG              | human   |
| <i>hF_IRF8</i>        | AGTAGCATGTATCCAGGACTGAT           | human   |
| <i>hR_IRF8</i>        | CACAGCGTAACCTCGTCTTC              | human   |
| <i>hF_MERTK</i>       | CTCTGGCGTAGAGCTATCACT             | human   |
| <i>hR_MERTK</i>       | AGGCTGGGTTGGTGAAAA                | human   |
| <i>hF_PROS1</i>       | TTGCACTTGTAACCAGGTTGG             | human   |
| <i>hR_PROS1</i>       | CAGGAACAGTGGTAACTTCCAG            | human   |
| <i>hF_TGFBR1</i>      | ACGGCGTTACAGTGTCTTCTG             | human   |
| <i>hR_TGFBR1</i>      | GCACATACAAACGGCCTATCTC            | human   |
| <i>hF_GAS6</i>        | CTCGTGCAGCCTATAAACCCCT            | human   |
| <i>hR_GAS6</i>        | TCCTCGTGTTCACTTTCACCG             | human   |
| <i>hF_C1QA</i>        | TCTGCACTGTACCCGGCTA               | human   |
| <i>hR_C1QA</i>        | CCCTGGTAAATGTGACCCTTTT            | human   |
| <i>hF_GPR34</i>       | GCAAGGTTGTGGGAACACTGT             | human   |
| <i>hR_GPR34</i>       | AGCGATCCAAACTGATGAATCC            | human   |
| <i>hF_ITGB5</i>       | GGAAGTTCGGAAACAGAGGGT             | human   |
| <i>hR_ITGB5</i>       | CTTTCGCCAGCCAAATCTTCTC            | human   |
| <i>hF_CD14</i>        | ACTTATCGACCATGGAGCGC              | human   |
| <i>hR_CD14</i>        | AGCTCACAAGGTTCTGGCGT              | human   |
| <i>hF_TMEM119</i>     | CTTCCTGGATGGGATAGTGGAC            | human   |
| <i>hR_TMEM119</i>     | GCACAGACGATGAACATCAGC             | human   |
| <i>hF_SPI1</i>        | AGCCATAGCGACCATTAC                | human   |
| <i>hR_SPI1</i>        | CTCCGTGAAGTTGTTCTC                | human   |
| <i>hF_GAPDH</i>       | GAGCACAAGAGGAAGAGAGACCC           | human   |
| <i>hR_GAPDH</i>       | GTTGAGCACAGGGTACTTTATTGATGGTACATG | human   |

**Differentiation of human monocyte-derived macrophages from peripheral blood mononuclear cells**

Human peripheral blood mononuclear cells (PBMCs) were isolated from the whole blood of anonymous donors (Australian Red Cross Blood Service, NSW) using Ficoll-Paque Plus (GE Healthcare) and density-gradient centrifugation. Briefly, whole blood was diluted 1:2 in phosphate buffered saline (PBS, layered above Ficoll and centrifuged for 45 min at 200 xg without deceleration. Following centrifugation, distinct phases were separated and the PBMC layer was collected and diluted 1:2 in PBS. Suspension was centrifuged at 500 x g for 10 min at 4°C. The pellet was washed three times with PBS by centrifugating 500 x g for 10 min at 4°C. Primary monocytes were isolated using magnetic microbead separation using CD14-conjugated microbeads under manufacturer specifications (Miltenyi Biotec) and positively selected cells were separated using LS+ columns (Miltenyi Biotec) positioned on a MidiMACS magnet (Miltenyi Biotec). Subsequent differentiation of CD14+ to macrophages was achieved by culturing the CD14+ cells in in high glucose DMEM, 10% FBS, 1% GlutaMAX, 1% P/S and 15 ng/ml MCSF (Miltenyi Biotec). The cells were seeded onto nunclon treated dishes at 10<sup>6</sup> cells/mL and incubated for 7 days at 37 °C, 5% CO<sub>2</sub>. Differentiation was determined by observing cell morphology in a Nikon TS100 light microscope (Nikon).

**3D co-cultures**

3D thin-layer Matrigel cultures were prepared as previously described (Choi et al., 2014, Kim et al., 2015). iPSC-derived neurons were resuspended at 1x10<sup>6</sup> cells/ml with 1:10 diluted Matrigel. plated on poly-L-ornithine-coated coverslips (Thermo Scientific) and left to polymerize overnight. On the next day, wells were filled with neural differentiation medium, consisting of DMEM/F-12 and Neurobasal (1:1), 1% B27 without vitamin A, 0.5% N2 supplement, 1% GlutaMAX<sup>TM</sup> and 0.5%P/S (all from Gibco), and the medium was changed every 3-4 days for 4-months. Then D16 iMGLs were applied on the top of cultures at density of 100,000 cells/ml. The 3D co-cultures were fixed and immunostained 7 days after incorporation of iMGLs.

3D cerebral brain organoids were generated as described (Lancaster, Knoblich, 2014). In brief, single iPSCs were seeded for embryoid body cultures in E8 with 20  $\mu$ M Y-27632 on Nunclon Sphera 96-well plate. On D6, neuroinduction was initiated by replacing to 1:1 E8 and neuroinduction medium (NIM) composing of DMEM/F-12, 1% N2, 1% GlutaMAX, 1% of non-essential amino acid mixture (NEAA), 0.5% P/S (all from Gibco) and 5U/ml Heparin (LEO Pharma). On D11, the spheres were embedded into Matrigel droplets, and transferred into differentiation medium without vitamin A (Dif-A) composed of 1:1 DMEM/F-12 and Neurobasal, 1% GlutaMAX, 0.5% NEAA, 0.5% N2, 0.5% B27 without vitamin A, 0.5% P/S, 2.5  $\mu$ g/ml insulin and 50  $\mu$ M 2-mercaptoethanol (Sigma). On D15, the organoids were transferred to magnetic spinners (Corning) in Dif+A, which was otherwise identical to Dif-A, but B27 with vitamin A was used. For organoid and iMGLco-cultures, 200 000 D16 iMGLs were transferred to 6-well ULA-plates with 10 organoids in Dif-A. After iMGLs freely attached to the organoids for 6 h, the organoids were transferred back to the magnetic spinners and were collected on D60 for immunohistochemical analysis.

### Immunocytochemistry

The cell cultures were fixed in 4% paraformaldehyde (PFA), permeabilized in 0.5% Triton X-100 (Sigma) and 0.2% Tween20 or in 0.2% Tergitol-type NP-40 + 0.3 M glycine, and blocked with 10% normal goat serum (NGS). Primary antibodies were incubated overnight at 4°C followed by labelling with Alexa Fluor 488 (1:1000) and 568 (1:500) conjugated anti-rabbit secondary antibodies (Thermo Fisher Scientific) and nuclei were stained with 5  $\mu$ g/ml Hoechst 33258 (Sigma) or 1  $\mu$ g/ml Hoechst 33342 (Invitrogen). Reagents were prepared in tris-buffered saline that was used for washing between each step. 3D thin-layer Matrigel co-cultures were fixed and immunostained similarly but with longer incubation times as previously described (Kim et al., 2015, Choi et al., 2014). Coverslips were mounted on glass microscope slides using Prolong Gold Antifade reagent (Thermo Fisher Scientific) or mounting medium (Southern Biotech). Organoids were fixed with 4% PFA for 4 h followed by overnight incubation in 30% sucrose (VWR) at 4°C and were then embedded into O.C.T. Compound (Sakura) for sectioning to 20  $\mu$ m slices using Cryotome (Leica CM1950). Sections were transferred on microscope slides (Thermo Scientific), blocked in 10% NGS (Millipore) in 0.05% Tween20 (Sigma), incubated with a rabbit anti-Iba1 primary antibody overnight followed by secondary antibody Alexa fluor 568 goat anti-rabbit (1:500) labeling. Slides were mounted in Vectashield mounting medium with DAPI (Vector) for imaging. Staining controls that omitted the primary antibody or substituted it with an IgG isotype, were used to confirm staining specificity. Immunocytochemistry was visualized using a ZEISS LSM 800 Airyscan super resolution microscope (ZEISS) with 10x and 40x objectives, and 2 x GAsp and 1 x Airyscan detectors. Super resolution images were taken as z-stack images and were presented as maximum intensity projections. Images were exported using ZEN 2.3 software. Imaging conditions were kept constant across iMGLs and negative controls.

**Table of primary antibodies used for immunocytochemistry.**

| Target              | Dilution | Source                    | Catalog number |
|---------------------|----------|---------------------------|----------------|
| rabbit anti-Iba1    | 1:500    | Wako                      | 019-19741      |
| rabbit anti-Iba1    | 1:500    | Abcam                     | ab153696       |
| rabbit anti-TMEM119 | 1:100    | Abcam                     | ab185333       |
| rabbit anti-CX3CR1  | 1:100    | Abcam                     | ab8021         |
| rabbit anti-TREM2   | 1:400    | Cell Signaling Technology | 91068          |
| rabbit anti-PU.1    | 1:500    | Cell Signaling Technology | 2266           |
| rabbit anti-P2RY12  | 1:125    | Sigma                     | HPA014518      |

### Western Blotting

Western blotting was done as described (Viswanathan et al., 2011) with minor changes. Two million iMGLs were lysed into T-PER tissue extraction buffer with a Halt<sup>TM</sup>protease inhibitor and Halt<sup>TM</sup>phosphatase inhibitor cocktails (all from Thermo Fisher Scientific). Protein concentrations were determined using Pierce<sup>TM</sup> BCA Protein Assay Kit (Thermo Fischer Scientific) and 15  $\mu$ g proteins were separated on NuPAGE<sup>TM</sup> 4–12% Bis-Tris Midi gels (Invitrogen) under reducing conditions and blotted onto polyvinylidene difluoride membranes. The iBlot 2 PBDF Regular Stacks and Dry Blotting System (both from Invitrogen) were used to transfer the proteins. The membranes were probed with the anti-APP (1:2000, Sigma) and anti-PSEN1 (1:1000, Chemicon) to detect FL- and CTF-PSEN, and anti-GAPDH (1:15000, Abcam) antibodies and labeled with horseradish peroxidase (HRP)-conjugated mouse and rabbit secondary antibodies (GE Healthcare). Proteins were detected and visualized by using enhanced chemiluminescence substrate prime (GE Healthcare) and BioRad Chemi Doc<sup>TM</sup> imaging system. Images were quantified using Image Lab (Bio-Rad Laboratories, Inc.) and protein levels were normalized to GAPDH.

## **A $\beta$ ELISA**

The amounts of A $\beta$ 1-40 and A $\beta$ 1-42 were measured from 48 h conditioned cell culture medium and cell extract with Amyloid beta 40 and 42 Human ELISA Kits (Invitrogen). The cells were seeded on D16 on PDL-coated 24-well Nunc plates at final concentration of 250 000 cells/well and maintained normally until D24 before collecting the samples. Protease inhibitor cocktail (Sigma) with a serine protease inhibitor, was added 1:200 to samples. Conditioned medium from iPSC-derived neurons was used as positive control and the sample was prepared as described previously (Oksanen et al., 2017).

## **Ca<sup>2+</sup> Imaging**

iMGLs on PDL-coated coverslips were loaded with the calcium-sensitive fluorescent dye Fluo-4, AM (5  $\mu$ M, Invitrogen) for 30 min followed by a 10-min washout in the basic solution containing 2.5 KCl (Scharlau Chemicals), 152 NaCl, 1 MgCl<sub>2</sub>, 10 HEPES (all from VWR chemicals), 10 glucose (MP Biomedicals) and 2 CaCl<sub>2</sub> (Merck KGaA) at pH 7.4 (all mM). Fluorescence was visualized using the imaging setup (TILL Photonics GmbH) consisting of a monochromatic light source and a CCD camera (SensiCam) with ex 495 nm, em  $\geq$ 520 nm, exposure time 100 ms and binning 2. The baseline was measured for 2 min before applying either 100  $\mu$ M ATP or ADP (both Sigma) for 5 s, followed with 2 min stabilization, and application of 10  $\mu$ M ionomycin (Tocris Bioscience) for 2s to induce maximal response. The chemicals were applied using a fast perfusion system Rapid Solution Changer RSC-200 (BioLogic Science). For quantification, the baseline was subtracted and the maximum amplitudes evoked by ATP or ADP were divided by the maximum amplitude of ionomycin to get a ratio. Data were analyzed using FEI offline analysis (TILL Photonics) and ImageJ (U. S. National Institutes of Health) and further analysis was automatized using MatLab (The MathWorks, Inc) and Origin (OriginLab Corporation).

## **Migration assay**

IncuCyte® scratch wound cell migration assay (Sartorius) was performed according to manufacturer's instructions through real-time visualization. In brief, confluent monolayer of iMGLs on PDL-coated 96-well ImageLock™ microplates (EssenBioScience) was wounded using a 96-well WoundMaker to create homogeneous, 700-800 $\mu$ m wide wounds and the cells were treated with 100  $\mu$ M ATP, ADP, or CX3CL1 (Peprotech), or freshly reconstituted 1  $\mu$ M sA $\beta$  (Bachem). Live-cell imaging scans in bright field were repeated every hour for 24 h. The wound width, confluence and relative wound density were analyzed with IncuCyte S3 2018 software (Essen BioScience).

## **Phagocytosis assays**

pHrodo™ Zymosan A BioParticle phagocytosis assay (Thermo Fisher Scientific) was performed using IncuCyte live cell imaging. iMGLs were prestimulated for 24 h with 100 ng/ml LPS (Sigma), 20 ng/ml IFN $\gamma$  (Peprotech) or LPS-IFN $\gamma$  (100ng/ml, 20 ng/ml) or were treated with 1 $\mu$ M sA $\beta$  or insoluble fA $\beta$  A $\beta$ 1-42 at the time of bead application in microglial maturation medium without FBS on PDL-coated nunc 96-well plates. fA $\beta$  was prepared from sA $\beta$  by incubating at 37°C for 7 days. pHrodo bioparticles were added in Opti-MEM (Gibco) at 62.5 $\mu$ g/ml and cells live-cell imaged in IncuCyte S3 every 30 minutes for 6 h to obtain fluorescent-time curve. Additionally, nuclei were stained after 2 h bead incubation with 5  $\mu$ g/ml H33342 for 5 min and iMGLs were live-imaged using a ZEISS IX70 fluorescent microscope with Axio Observer.Z1 (ZEISS) with 20X magnification. The total pHrodo fluorescence intensity was normalized to cell confluence analyzed by IncuCyte S3 2018 or to number of nuclei analyzed by ImageJ. In addition, FITC Zymosan A S. cerevisiae BioParticles (Thermo Fisher Scientific) were opsonized in FBS and added on iMGLs on Matrigel-coated glass coverslips at density of 1.5 bioparticles per cell. The assay was terminated by 4% PFA fixation after 2.5-3 h. Coverslips were washed 8x for 5 min using TBS to remove free beads that had not been internalized. Nuclei were stained using 1  $\mu$ g/mL Hoechst 33342 (Thermo Fisher Scientific). Coverslips were mounted on glass microscope slides using Prolong Gold Antifade reagent (Thermo Fisher Scientific) and were imaged using a Leica SP8 confocal microscope (Leica). For quantification, fluorescence was measured as corrected mean grey value and analyzed using ImageJ.

## **Cytometric Bead Array**

Cytokine secretion iMGLs was analyzed using the Cytometric Bead Array (CBA) with human soluble protein flex sets (all from BD Biosciences). The medium was collected from plates prestimulated for 24h for pHrodo assays. Media was diluted 1:1 for LPS-treated and 1:10 for LPS-IFN $\gamma$ -treated samples in assay diluent. Twenty microliters of sample or cytokine standard was incubated with 20  $\mu$ l of bead mixture (bead dilutions 1:75) and then with 20 $\mu$ l of diluted detection reagent (1:75). Samples run on Cytoflex S (Beckman Coulter) by detecting at least 300 events for each cytokine. Beads positions clustered with channels 638/660 nm (APC) and 638/780 nm (APC-A750) off the 638 nm red laser. Cytokine reporter PE fluorescence was measured through 561/585 nm channel off 561 nm yellow-green laser. The data was analyzed with FCAP array (SoftFlow) and regression analysis was used to calculate cytokine concentrations from known standards.



### **MitoStress mitochondrial metabolism assay**

Mitochondrial metabolism of iMGLs was analyzed with MitoStress test (Agilent) following manufacturer's guidelines. The cells were pre-stimulated for 24 h with LPS, IL-4 (Peprotech), IFN $\gamma$  or with LPS-IFN $\gamma$  (20 ng/ml for all) at density of 150 000 cells/well. The XF assay medium (Agilent) was supplemented with 25 mM GlutaMAX and 1 mM sodium pyruvate (Gibco). Mitochondrial electron transport chain modulators all 1  $\mu$ M were injected during the assay sequentially: 1) oligomycin to inhibit ATP synthase, 2) carbonyl cyanide-4-(trifluoromethoxy)phenylhydrazone (FCCP) to disrupt the proton gradient and membrane potential, and 3) a mixture of rotenone and antimycin A (RA) to switch off the mitochondrial respiration (all from Sigma). Changes in OCR in response to injections were detected with Seahorse XF24 analyzer (Agilent). Results were normalized to total protein content measured with Pierce BCA protein assay kit and the data was analyzed with Wave 2.4 (Agilent). Mitochondrial parameters were calculated from OCRs according to manufacturer's instructions.

### **Experimental Procedures References**

- Aibar, S., Gonzalez-Blas, C.B., Moerman, T., Huynh-Thu, V.A., Imrichova, H., Hulselmans, G., Rambow, F., Marine, J.C., Geurts, P., Aerts, J., et al 2017, "SCENIC: single-cell regulatory network inference and clustering", *Nature methods*, vol. 14, no. 11, pp. 1083-1086.
- Bolstad, B.M., Irizarry, R.A., Astrand, M. & Speed, T.P. 2003, "A comparison of normalization methods for high density oligonucleotide array data based on variance and bias", *Bioinformatics (Oxford, England)*, vol. 19, no. 2, pp. 185-193.
- Choi, S.H., Kim, Y.H., Hebisch, M., Sliwinski, C., Lee, S., D'Avanzo, C., Chen, H., Hooli, B., Asselin, C., Muffat, J., et al 2014, "A three-dimensional human neural cell culture model of Alzheimer's disease", *Nature*, vol. 515, no. 7526, pp. 274-278.
- Colella, S., Yau, C., Taylor, J.M., Mirza, G., Butler, H., Clouston, P., Bassett, A.S., Seller, A., Holmes, C.C. & Ragoussis, J. 2007, "QuantiSNP: an Objective Bayes Hidden-Markov Model to detect and accurately map copy number variation using SNP genotyping data", *Nucleic acids research*, vol. 35, no. 6, pp. 2013-2025.
- Kim, Y.H., Choi, S.H., D'Avanzo, C., Hebisch, M., Sliwinski, C., Bylykbashi, E., Washicosky, K.J., Klee, J.B., Brustle, O., Tanzi, R.E., et al 2015, "A 3D human neural cell culture system for modeling Alzheimer's disease", *Nature protocols*, vol. 10, no. 7, pp. 985-1006.
- Lancaster, M.A. & Knoblich, J.A. 2014, "Generation of cerebral organoids from human pluripotent stem cells", *Nature protocols*, vol. 9, no. 10, pp. 2329-2340.
- Li, B. & Dewey, C.N. 2011, "RSEM: accurate transcript quantification from RNA-Seq data with or without a reference genome", *BMC bioinformatics*, vol. 12, pp. 323-2105-12-323.
- Lim, S.Y., Sivakumaran, P., Crombie, D.E., Dusting, G.J., Pebay, A. & Dilley, R.J. 2013, "Trichostatin A enhances differentiation of human induced pluripotent stem cells to cardiogenic cells for cardiac tissue engineering", *Stem cells translational medicine*, vol. 2, no. 9, pp. 715-725.
- Love, M.I., Huber, W. & Anders, S. 2014, "Moderated estimation of fold change and dispersion for RNA-seq data with DESeq2", *Genome biology*, vol. 15, no. 12, pp. 550-014-0550-8.
- Ritchie, M.E., Phipson, B., Wu, D., Hu, Y., Law, C.W., Shi, W. & Smyth, G.K. 2015, "limma powers differential expression analyses for RNA-sequencing and microarray studies", *Nucleic acids research*, vol. 43, no. 7, pp. e47.
- Ruijter, J.M., Ramakers, C., Hoogaars, W.M., Karlen, Y., Bakker, O., van den Hoff, M.J. & Moorman, A.F. 2009, "Amplification efficiency: linking baseline and bias in the analysis of quantitative PCR data", *Nucleic acids research*, vol. 37, no. 6, pp. e45.

- Schmittgen, T.D. & Livak, K.J. 2008, "Analyzing real-time PCR data by the comparative C(T) method", *Nature protocols*, vol. 3, no. 6, pp. 1101-1108.
- Soneson, C., Love, M.I. & Robinson, M.D. 2015, "Differential analyses for RNA-seq: transcript-level estimates improve gene-level inferences", *BMC Research Notes*, vol. 4, pp. 1521.
- Viswanathan, J., Haapasalo, A., Bottcher, C., Miettinen, R., Kurkinen, K.M., Lu, A., Thomas, A., Maynard, C.J., Romano, D., Hyman, B.T., et al 2011, "Alzheimer's disease-associated ubiquilin-1 regulates presenilin-1 accumulation and aggresome formation", *Traffic (Copenhagen, Denmark)*, vol. 12, no. 3, pp. 330-348.
- Wang, K., Li, M., Hadley, D., Liu, R., Glessner, J., Grant, S.F., Hakonarson, H. & Bucan, M. 2007, "PennCNV: an integrated hidden Markov model designed for high-resolution copy number variation detection in whole-genome SNP genotyping data", *Genome research*, vol. 17, no. 11, pp. 1665-1674.
- Wheeler, D.L., Barrett, T., Benson, D.A., Bryant, S.H., Canese, K., Chetvernin, V., Church, D.M., DiCuccio, M., Edgar, R., Federhen, S., et al 2007, "Database resources of the National Center for Biotechnology Information", *Nucleic acids research*, vol. 35, no. Database issue, pp. D5-12.
